# Supplementary material for: Genome-wide analysis of transmembrane 9 superfamily genes in wheat (Triticum aestivum) and their expression in the roots under nitrogen limitation and Bacillus amyloliquefaciens PDR1 treatment conditions
Source: Front Plant Sci. 2024 Jan 8;14:1324974. doi: 10.3389/fpls.2023.1324974 (PMC10800943; doi:10.3389/fpls.2023.1324974)
Supplement: Supplementary Table S2 — Protein sequences of TM9SF genes from different plant species. [file Table_2.xlsx]

## Sheet: phyloinputdata22hitdata
#Batch CD-search tool	NIH/NLM/NCBI
#cdsid	QM3-qcdsearch-2D931DFE6E703295-3EFDFF1F04EFD94C
#datatype	hitsFull Results
#status	0
#Start time	2022-05-25T08:50:24	Run time	0:00:00:17
#status	success
Query	Hit type	PSSM-ID	From	To	E-Value	Bitscore	Accession	Short name	Incomplete	Superfamily
Q#1 - >TraesTM9SF-1	non-specific	397233	237	427	7.84268e-07	51.3855	pfam02990	EMP70	N	cl09289
Q#1 - >TraesTM9SF-1	superfamily	397233	237	427	7.84268e-07	51.3855	cl09289	EMP70 superfamily	N	-
Q#2 - >TraesTM9SF-2	non-specific	397233	43	348	1.17357e-23	101.847	pfam02990	EMP70	-	cl09289
Q#2 - >TraesTM9SF-2	superfamily	397233	43	348	1.17357e-23	101.847	cl09289	EMP70 superfamily	-	-
Q#3 - >TraesTM9SF-3	non-specific	397233	36	305	2.99223e-12	67.949	pfam02990	EMP70	C	cl09289
Q#3 - >TraesTM9SF-3	superfamily	397233	36	305	2.99223e-12	67.949	cl09289	EMP70 superfamily	C	-
Q#4 - >TraesTM9SF-4	non-specific	397233	2	287	1.34717e-42	153.078	pfam02990	EMP70	-	cl09289
Q#4 - >TraesTM9SF-4	superfamily	397233	2	287	1.34717e-42	153.078	cl09289	EMP70 superfamily	-	-
Q#5 - >TraesTM9SF-5	specific	397233	16	345	2.45803e-45	162.323	pfam02990	EMP70	-	cl09289
Q#5 - >TraesTM9SF-5	superfamily	397233	16	345	2.45803e-45	162.323	cl09289	EMP70 superfamily	-	-
Q#6 - >TraesTM9SF-6	non-specific	397233	91	308	6.56675e-18	84.8978	pfam02990	EMP70	-	cl09289
Q#6 - >TraesTM9SF-6	superfamily	397233	91	308	6.56675e-18	84.8978	cl09289	EMP70 superfamily	-	-
Q#7 - >TraesTM9SF-7	non-specific	397233	150	278	3.06441e-06	48.6891	pfam02990	EMP70	N	cl09289
Q#7 - >TraesTM9SF-7	superfamily	397233	150	278	3.06441e-06	48.6891	cl09289	EMP70 superfamily	N	-
Q#8 - >TraesTM9SF-8	non-specific	397233	54	298	3.0984e-17	83.357	pfam02990	EMP70	C	cl09289
Q#8 - >TraesTM9SF-8	superfamily	397233	54	298	3.0984e-17	83.357	cl09289	EMP70 superfamily	C	-
Q#9 - >TraesTM9SF-9	non-specific	397233	80	299	1.09621e-20	93.3722	pfam02990	EMP70	-	cl09289
Q#9 - >TraesTM9SF-9	superfamily	397233	80	299	1.09621e-20	93.3722	cl09289	EMP70 superfamily	-	-
Q#10 - >TraesTM9SF-10	non-specific	397233	43	349	1.60539e-25	107.239	pfam02990	EMP70	-	cl09289
Q#10 - >TraesTM9SF-10	superfamily	397233	43	349	1.60539e-25	107.239	cl09289	EMP70 superfamily	-	-
Q#11 - >TraesTM9SF-11	non-specific	397233	17	323	1.76702e-25	106.854	pfam02990	EMP70	-	cl09289
Q#11 - >TraesTM9SF-11	superfamily	397233	17	323	1.76702e-25	106.854	cl09289	EMP70 superfamily	-	-
Q#12 - >TraesTM9SF-12	non-specific	397233	239	429	4.93565e-06	48.6891	pfam02990	EMP70	N	cl09289
Q#12 - >TraesTM9SF-12	superfamily	397233	239	429	4.93565e-06	48.6891	cl09289	EMP70 superfamily	N	-
Q#13 - >TraesTM9SF-13	non-specific	397233	44	343	5.31943e-35	134.203	pfam02990	EMP70	-	cl09289
Q#13 - >TraesTM9SF-13	superfamily	397233	44	343	5.31943e-35	134.203	cl09289	EMP70 superfamily	-	-
Q#14 - >TraesTM9SF-14	non-specific	397233	79	349	4.05201e-26	109.165	pfam02990	EMP70	-	cl09289
Q#14 - >TraesTM9SF-14	superfamily	397233	79	349	4.05201e-26	109.165	cl09289	EMP70 superfamily	-	-
Q#15 - >TraesTM9SF-15	non-specific	397233	79	378	1.42866e-35	136.515	pfam02990	EMP70	-	cl09289
Q#15 - >TraesTM9SF-15	superfamily	397233	79	378	1.42866e-35	136.515	cl09289	EMP70 superfamily	-	-
Q#16 - >TraesTM9SF-16	non-specific	397233	141	393	1.27354e-18	87.9794	pfam02990	EMP70	N	cl09289
Q#16 - >TraesTM9SF-16	superfamily	397233	141	393	1.27354e-18	87.9794	cl09289	EMP70 superfamily	N	-
Q#17 - >TraesTM9SF-17	non-specific	397233	96	369	9.80808e-17	81.8162	pfam02990	EMP70	-	cl09289
Q#17 - >TraesTM9SF-17	superfamily	397233	96	369	9.80808e-17	81.8162	cl09289	EMP70 superfamily	-	-
Q#18 - >TraesTM9SF-18	specific	397233	38	375	5.13834e-50	175.805	pfam02990	EMP70	-	cl09289
Q#18 - >TraesTM9SF-18	superfamily	397233	38	375	5.13834e-50	175.805	cl09289	EMP70 superfamily	-	-
Q#19 - >TraesTM9SF-19	non-specific	397233	79	378	5.08459e-36	137.67	pfam02990	EMP70	-	cl09289
Q#19 - >TraesTM9SF-19	superfamily	397233	79	378	5.08459e-36	137.67	cl09289	EMP70 superfamily	-	-
Q#20 - >TraesTM9SF-20	non-specific	397233	97	371	9.89818e-17	81.8162	pfam02990	EMP70	-	cl09289
Q#20 - >TraesTM9SF-20	superfamily	397233	97	371	9.89818e-17	81.8162	cl09289	EMP70 superfamily	-	-
Q#21 - >TraesTM9SF-21	non-specific	397233	80	299	1.2724e-20	92.987	pfam02990	EMP70	-	cl09289
Q#21 - >TraesTM9SF-21	superfamily	397233	80	299	1.2724e-20	92.987	cl09289	EMP70 superfamily	-	-
Q#22 - >TraesTM9SF-22	specific	397233	14	350	1.20078e-47	168.871	pfam02990	EMP70	-	cl09289
Q#22 - >TraesTM9SF-22	superfamily	397233	14	350	1.20078e-47	168.871	cl09289	EMP70 superfamily	-	-
Q#23 - >TraesTM9SF-23	non-specific	397233	39	346	9.18421e-42	152.693	pfam02990	EMP70	-	cl09289
Q#23 - >TraesTM9SF-23	superfamily	397233	39	346	9.18421e-42	152.693	cl09289	EMP70 superfamily	-	-
Q#24 - >TraesTM9SF-24	non-specific	397233	39	365	2.02137e-43	157.701	pfam02990	EMP70	-	cl09289
Q#24 - >TraesTM9SF-24	superfamily	397233	39	365	2.02137e-43	157.701	cl09289	EMP70 superfamily	-	-
Q#25 - >TraesTM9SF-25	non-specific	397233	8	252	5.83385e-18	83.357	pfam02990	EMP70	-	cl09289
Q#25 - >TraesTM9SF-25	superfamily	397233	8	252	5.83385e-18	83.357	cl09289	EMP70 superfamily	-	-
Q#26 - >TraesTM9SF-26	non-specific	397233	151	279	3.0552e-06	48.6891	pfam02990	EMP70	N	cl09289
Q#26 - >TraesTM9SF-26	superfamily	397233	151	279	3.0552e-06	48.6891	cl09289	EMP70 superfamily	N	-
Q#27 - >TraesTM9SF-27	non-specific	397233	93	309	7.54937e-18	84.8978	pfam02990	EMP70	-	cl09289
Q#27 - >TraesTM9SF-27	superfamily	397233	93	309	7.54937e-18	84.8978	cl09289	EMP70 superfamily	-	-
Q#28 - >TraesTM9SF-28	non-specific	397233	95	369	1.14436e-16	81.431	pfam02990	EMP70	-	cl09289
Q#28 - >TraesTM9SF-28	superfamily	397233	95	369	1.14436e-16	81.431	cl09289	EMP70 superfamily	-	-
Q#29 - >TraesTM9SF-29	non-specific	397233	69	341	2.53899e-23	101.076	pfam02990	EMP70	-	cl09289
Q#29 - >TraesTM9SF-29	superfamily	397233	69	341	2.53899e-23	101.076	cl09289	EMP70 superfamily	-	-
Q#30 - >TraesTM9SF-30	non-specific	397233	235	424	1.33837e-07	53.6967	pfam02990	EMP70	N	cl09289
Q#30 - >TraesTM9SF-30	superfamily	397233	235	424	1.33837e-07	53.6967	cl09289	EMP70 superfamily	N	-
Q#31 - >TraesTM9SF-31	non-specific	397233	55	299	6.76124e-17	82.2014	pfam02990	EMP70	C	cl09289
Q#31 - >TraesTM9SF-31	superfamily	397233	55	299	6.76124e-17	82.2014	cl09289	EMP70 superfamily	C	-
Q#32 - >TraesTM9SF-32	non-specific	397233	54	298	7.01174e-17	82.2014	pfam02990	EMP70	C	cl09289
Q#32 - >TraesTM9SF-32	superfamily	397233	54	298	7.01174e-17	82.2014	cl09289	EMP70 superfamily	C	-
Q#33 - >TraesTM9SF-33	non-specific	397233	54	319	8.97915e-13	69.875	pfam02990	EMP70	C	cl09289
Q#33 - >TraesTM9SF-33	superfamily	397233	54	319	8.97915e-13	69.875	cl09289	EMP70 superfamily	C	-
Q#34 - >TraesTM9SF-34	non-specific	397233	17	322	1.29627e-23	101.461	pfam02990	EMP70	-	cl09289
Q#34 - >TraesTM9SF-34	superfamily	397233	17	322	1.29627e-23	101.461	cl09289	EMP70 superfamily	-	-
Q#35 - >TraesTM9SF-35	non-specific	397233	43	348	1.86543e-23	101.461	pfam02990	EMP70	-	cl09289
Q#35 - >TraesTM9SF-35	superfamily	397233	43	348	1.86543e-23	101.461	cl09289	EMP70 superfamily	-	-
Q#36 - >TraesTM9SF-36	non-specific	397233	141	392	2.13874e-18	87.209	pfam02990	EMP70	N	cl09289
Q#36 - >TraesTM9SF-36	superfamily	397233	141	392	2.13874e-18	87.209	cl09289	EMP70 superfamily	N	-
Q#37 - >TraesTM9SF-37	non-specific	397233	44	343	5.4268e-35	133.818	pfam02990	EMP70	-	cl09289
Q#37 - >TraesTM9SF-37	superfamily	397233	44	343	5.4268e-35	133.818	cl09289	EMP70 superfamily	-	-
Q#38 - >TraesTM9SF-38	non-specific	397233	79	378	7.11806e-36	136.9	pfam02990	EMP70	-	cl09289
Q#38 - >TraesTM9SF-38	superfamily	397233	79	378	7.11806e-36	136.9	cl09289	EMP70 superfamily	-	-
Q#39 - >TraesTM9SF-39	non-specific	397233	79	378	1.44296e-35	136.515	pfam02990	EMP70	-	cl09289
Q#39 - >TraesTM9SF-39	superfamily	397233	79	378	1.44296e-35	136.515	cl09289	EMP70 superfamily	-	-
Q#40 - >TraesTM9SF-40	non-specific	397233	79	353	7.23874e-28	114.173	pfam02990	EMP70	-	cl09289
Q#40 - >TraesTM9SF-40	superfamily	397233	79	353	7.23874e-28	114.173	cl09289	EMP70 superfamily	-	-
Q#41 - >TraesTM9SF-41	non-specific	397233	79	298	1.08143e-20	93.3722	pfam02990	EMP70	-	cl09289
Q#41 - >TraesTM9SF-41	superfamily	397233	79	298	1.08143e-20	93.3722	cl09289	EMP70 superfamily	-	-
Q#42 - >TraesTM9SF-42	non-specific	397233	88	340	1.1244e-18	87.209	pfam02990	EMP70	N	cl09289
Q#42 - >TraesTM9SF-42	superfamily	397233	88	340	1.1244e-18	87.209	cl09289	EMP70 superfamily	N	-
Q#43 - >TraesTM9SF-43	specific	397233	34	370	8.00766e-49	172.338	pfam02990	EMP70	-	cl09289
Q#43 - >TraesTM9SF-43	superfamily	397233	34	370	8.00766e-49	172.338	cl09289	EMP70 superfamily	-	-
Q#44 - >TraesTM9SF-44	specific	397233	40	367	6.41642e-45	161.938	pfam02990	EMP70	-	cl09289
Q#44 - >TraesTM9SF-44	superfamily	397233	40	367	6.41642e-45	161.938	cl09289	EMP70 superfamily	-	-
Q#45 - >TraesTM9SF-45	non-specific	397233	34	300	1.73852e-13	71.801	pfam02990	EMP70	C	cl09289
Q#45 - >TraesTM9SF-45	superfamily	397233	34	300	1.73852e-13	71.801	cl09289	EMP70 superfamily	C	-
Q#46 - >TraesTM9SF-46	non-specific	397233	151	279	3.01071e-06	48.6891	pfam02990	EMP70	N	cl09289
Q#46 - >TraesTM9SF-46	superfamily	397233	151	279	3.01071e-06	48.6891	cl09289	EMP70 superfamily	N	-
Q#47 - >TraesTM9SF-47	non-specific	397233	92	309	6.56675e-18	84.8978	pfam02990	EMP70	-	cl09289
Q#47 - >TraesTM9SF-47	superfamily	397233	92	309	6.56675e-18	84.8978	cl09289	EMP70 superfamily	-	-
