# Supplementary material for: Genome-wide analysis of transmembrane 9 superfamily genes in wheat (Triticum aestivum) and their expression in the roots under nitrogen limitation and Bacillus amyloliquefaciens PDR1 treatment conditions
Source: Front Plant Sci. 2024 Jan 8;14:1324974. doi: 10.3389/fpls.2023.1324974 (PMC10800943; doi:10.3389/fpls.2023.1324974)
Supplement: Supplementary Table S3 — Coding domains in TraesTM9SF sequences. [file Table_3.xlsx]

## Sheet: Sheet1
#SeqNO.	Comp.Result	Di-pep.Result	part-Comp.Result	chemo-type.Result	Neighbor	#Combined:	extra	plas	cytop	cytos	er	golgi	lyso	mito	chlo	pero	vacu	nuc	#Most-likely-Location	#SeqName
#2	Extracellular	Extracellular	Extracellular	Nuclear	Extracellular	#:	2.5	0.152	0.238	0.009	0.026	0.008	0.067	0.325	0.207	0.039	0.08	1.351	Extracellular	TraesTM9SF-2
#3	Nuclear	Extracellular	Extracellular	Nuclear	Extracellular	#:	1.747	0.53	0.461	0.019	0.027	0.016	0.09	0.333	0.341	0.073	0.144	1.217	Extracellular	TraesTM9SF-3
#5	Extracellular	Extracellular	Extracellular	Nuclear	Extracellular	#:	1.603	0.213	0.638	0.014	0.031	0.013	0.213	0.352	0.285	0.059	0.082	1.497	Extracellular	TraesTM9SF-5
#6	Extracellular	Extracellular	Extracellular	Nuclear	Extracellular	#:	1.881	0.248	0.332	0.018	0.032	0.014	0.15	0.322	0.212	0.051	0.168	1.571	Extracellular	TraesTM9SF-6
#7	Extracellular	Extracellular	Extracellular	Nuclear	Extracellular	#:	2.175	0.191	0.289	0.015	0.027	0.011	0.142	0.29	0.178	0.044	0.167	1.472	Extracellular	TraesTM9SF-7
#8	Nuclear	Extracellular	Extracellular	Nuclear	Extracellular	#:	1.646	0.509	0.398	0.017	0.025	0.014	0.095	0.364	0.338	0.062	0.139	1.393	Extracellular	TraesTM9SF-8
#9	Extracellular	Extracellular	Extracellular	Nuclear	Extracellular	#:	2.205	0.22	0.337	0.014	0.029	0.01	0.172	0.27	0.181	0.043	0.133	1.387	Extracellular	TraesTM9SF-9
#10	Extracellular	Extracellular	Extracellular	Nuclear	Extracellular	#:	2.42	0.162	0.262	0.009	0.028	0.009	0.077	0.327	0.201	0.038	0.082	1.385	Extracellular	TraesTM9SF-10
#11	Extracellular	Extracellular	Extracellular	Nuclear	Extracellular	#:	2.088	0.201	0.264	0.01	0.027	0.01	0.083	0.435	0.212	0.057	0.08	1.534	Extracellular	TraesTM9SF-11
#13	Nuclear	Extracellular	Extracellular	Nuclear	Extracellular	#:	2.083	0.273	0.506	0.014	0.065	0.014	0.143	0.481	0.335	0.052	0.108	0.925	Extracellular	TraesTM9SF-13
#14	Nuclear	Extracellular	Extracellular	Nuclear	Extracellular	#:	1.805	0.174	0.464	0.015	0.043	0.014	0.139	0.536	0.348	0.054	0.113	1.296	Extracellular	TraesTM9SF-14
#15	Extracellular	Extracellular	Extracellular	Nuclear	Extracellular	#:	2.291	0.202	0.413	0.012	0.036	0.011	0.107	0.378	0.278	0.047	0.089	1.138	Extracellular	TraesTM9SF-15
#18	Extracellular	Extracellular	Extracellular	Nuclear	Extracellular	#:	2.049	0.192	0.344	0.012	0.029	0.01	0.094	0.35	0.383	0.066	0.113	1.357	Extracellular	TraesTM9SF-18
#19	Extracellular	Extracellular	Extracellular	Nuclear	Extracellular	#:	2.355	0.167	0.376	0.01	0.031	0.009	0.1	0.363	0.264	0.041	0.079	1.203	Extracellular	TraesTM9SF-19
#21	Extracellular	Extracellular	Extracellular	Nuclear	Extracellular	#:	2.2	0.219	0.345	0.013	0.028	0.01	0.176	0.266	0.181	0.044	0.136	1.382	Extracellular	TraesTM9SF-21
#22	Extracellular	Extracellular	Extracellular	Nuclear	Extracellular	#:	1.813	0.218	0.578	0.013	0.031	0.012	0.128	0.321	0.278	0.062	0.115	1.431	Extracellular	TraesTM9SF-22
#23	Nuclear	Extracellular	Extracellular	Nuclear	Extracellular	#:	1.657	0.283	0.415	0.014	0.046	0.012	0.226	0.492	0.498	0.065	0.096	1.197	Extracellular	TraesTM9SF-23
#24	Extracellular	Extracellular	Extracellular	Nuclear	Extracellular	#:	2.049	0.237	0.362	0.013	0.038	0.01	0.163	0.429	0.377	0.055	0.077	1.191	Extracellular	TraesTM9SF-24
#25	Extracellular	Extracellular	Extracellular	Nuclear	Extracellular	#:	2.105	0.284	0.291	0.011	0.031	0.012	0.168	0.357	0.262	0.066	0.095	1.317	Extracellular	TraesTM9SF-25
#26	Extracellular	Extracellular	Extracellular	Nuclear	Extracellular	#:	2.253	0.179	0.276	0.014	0.025	0.01	0.113	0.287	0.187	0.04	0.158	1.456	Extracellular	TraesTM9SF-26
#27	Extracellular	Extracellular	Extracellular	Nuclear	Extracellular	#:	1.951	0.236	0.333	0.017	0.03	0.013	0.127	0.312	0.209	0.047	0.161	1.563	Extracellular	TraesTM9SF-27
#29	Extracellular	Extracellular	Extracellular	Nuclear	Extracellular	#:	2.276	0.187	0.285	0.011	0.029	0.01	0.069	0.339	0.294	0.057	0.096	1.347	Extracellular	TraesTM9SF-29
#31	Nuclear	Extracellular	Extracellular	Nuclear	Extracellular	#:	1.648	0.512	0.403	0.017	0.025	0.014	0.097	0.373	0.352	0.06	0.129	1.368	Extracellular	TraesTM9SF-31
#32	Nuclear	Extracellular	Extracellular	Nuclear	Extracellular	#:	1.562	0.535	0.409	0.018	0.026	0.015	0.102	0.396	0.343	0.065	0.137	1.392	Extracellular	TraesTM9SF-32
#33	Nuclear	Extracellular	Extracellular	Nuclear	Extracellular	#:	2.016	0.466	0.461	0.017	0.027	0.015	0.095	0.315	0.322	0.063	0.165	1.037	Extracellular	TraesTM9SF-33
#34	Extracellular	Extracellular	Extracellular	Nuclear	Extracellular	#:	2.076	0.19	0.242	0.009	0.024	0.009	0.07	0.459	0.221	0.056	0.089	1.553	Extracellular	TraesTM9SF-34
#35	Extracellular	Extracellular	Extracellular	Nuclear	Extracellular	#:	2.4	0.152	0.236	0.009	0.027	0.008	0.068	0.366	0.201	0.04	0.093	1.4	Extracellular	TraesTM9SF-35
#37	Nuclear	Extracellular	Extracellular	Nuclear	Extracellular	#:	2.038	0.277	0.507	0.014	0.064	0.015	0.157	0.483	0.345	0.053	0.114	0.932	Extracellular	TraesTM9SF-37
#38	Nuclear	Extracellular	Extracellular	Nuclear	Extracellular	#:	2.195	0.174	0.394	0.011	0.032	0.011	0.116	0.404	0.286	0.046	0.092	1.239	Extracellular	TraesTM9SF-38
#39	Extracellular	Extracellular	Extracellular	Nuclear	Extracellular	#:	2.252	0.204	0.412	0.012	0.035	0.011	0.118	0.381	0.286	0.049	0.094	1.145	Extracellular	TraesTM9SF-39
#40	Extracellular	Extracellular	Extracellular	Nuclear	Extracellular	#:	2.058	0.166	0.373	0.013	0.036	0.011	0.121	0.414	0.285	0.049	0.089	1.386	Extracellular	TraesTM9SF-40
#41	Extracellular	Extracellular	Extracellular	Nuclear	Extracellular	#:	2.214	0.213	0.333	0.013	0.028	0.01	0.178	0.268	0.18	0.044	0.134	1.385	Extracellular	TraesTM9SF-41
#43	Extracellular	Extracellular	Extracellular	Nuclear	Extracellular	#:	1.846	0.201	0.391	0.014	0.033	0.012	0.116	0.374	0.369	0.078	0.127	1.439	Extracellular	TraesTM9SF-43
#44	Extracellular	Extracellular	Extracellular	Nuclear	Extracellular	#:	1.994	0.216	0.399	0.012	0.035	0.01	0.138	0.433	0.394	0.059	0.099	1.211	Extracellular	TraesTM9SF-44
#45	Nuclear	Extracellular	Extracellular	Nuclear	Extracellular	#:	1.788	0.483	0.468	0.02	0.028	0.016	0.115	0.342	0.317	0.081	0.168	1.173	Extracellular	TraesTM9SF-45
#46	Extracellular	Extracellular	Extracellular	Nuclear	Extracellular	#:	2.211	0.19	0.274	0.016	0.027	0.011	0.134	0.296	0.181	0.042	0.154	1.464	Extracellular	TraesTM9SF-46
#47	Extracellular	Extracellular	Extracellular	Nuclear	Extracellular	#:	1.892	0.25	0.329	0.019	0.033	0.014	0.148	0.326	0.21	0.05	0.157	1.572	Extracellular	TraesTM9SF-47
#1	Nuclear	PlasmaMembrane	Chloroplast	Nuclear	Extracellular	#:	0.998	0.616	0.464	0.027	0.027	0.016	0.038	0.354	0.93	0.069	0.086	1.377	Nuclear	TraesTM9SF-1
#4	Nuclear	Extracellular	Extracellular	Nuclear	Extracellular	#:	1.183	0.276	0.621	0.014	0.037	0.015	0.229	0.479	0.417	0.07	0.095	1.564	Nuclear	TraesTM9SF-4
#12	Nuclear	PlasmaMembrane	Chloroplast	Nuclear	Extracellular	#:	0.941	0.579	0.46	0.027	0.03	0.018	0.042	0.388	0.933	0.085	0.106	1.392	Nuclear	TraesTM9SF-12
#16	Nuclear	Extracellular	Chloroplast	Nuclear	Extracellular	#:	1.176	0.427	0.491	0.023	0.031	0.018	0.087	0.471	0.721	0.096	0.134	1.327	Nuclear	TraesTM9SF-16
#17	Nuclear	PlasmaMembrane	Extracellular	Nuclear	Extracellular	#:	1.209	0.559	0.558	0.017	0.029	0.013	0.1	0.39	0.464	0.107	0.128	1.426	Nuclear	TraesTM9SF-17
#20	Nuclear	PlasmaMembrane	Extracellular	Nuclear	Extracellular	#:	1.113	0.62	0.525	0.018	0.027	0.014	0.098	0.401	0.523	0.101	0.12	1.44	Nuclear	TraesTM9SF-20
#28	Nuclear	PlasmaMembrane	Extracellular	Nuclear	Extracellular	#:	1.181	0.584	0.563	0.018	0.028	0.014	0.098	0.404	0.475	0.103	0.122	1.411	Nuclear	TraesTM9SF-28
#30	Nuclear	PlasmaMembrane	Chloroplast	Nuclear	Extracellular	#:	1.069	0.554	0.481	0.025	0.028	0.017	0.04	0.344	0.849	0.072	0.098	1.422	Nuclear	TraesTM9SF-30
#36	Nuclear	Extracellular	Chloroplast	Nuclear	Extracellular	#:	1.21	0.449	0.467	0.024	0.03	0.016	0.078	0.461	0.76	0.089	0.119	1.298	Nuclear	TraesTM9SF-36
#42	Nuclear	PlasmaMembrane	Cytoplasmic	Nuclear	Extracellular	#:	0.975	0.412	0.632	0.021	0.034	0.021	0.119	0.505	0.569	0.087	0.144	1.48	Nuclear	TraesTM9SF-42
