# Supplementary material for: Genome-wide analysis of transmembrane 9 superfamily genes in wheat (Triticum aestivum) and their expression in the roots under nitrogen limitation and Bacillus amyloliquefaciens PDR1 treatment conditions
Source: Front Plant Sci. 2024 Jan 8;14:1324974. doi: 10.3389/fpls.2023.1324974 (PMC10800943; doi:10.3389/fpls.2023.1324974)
Supplement: Supplementary Table S4 — Subcellular localization of TraesTM9SF genes from different plant species. [file Table_4.xlsx]

## Sheet: Identity
TraesTM9SF-1	1
TraesTM9SF-2	0.096	1
TraesTM9SF-3	0.1079	0.104	1
TraesTM9SF-4	0.1025	0.0929	0.0929	1
TraesTM9SF-5	0.0756	0.1162	0.0864	0.0833	1
TraesTM9SF-6	0.107	0.0933	0.107	0.0801	0.0837	1
TraesTM9SF-7	0.0991	0.1104	0.0963	0.0737	0.0679	0.4645	1
TraesTM9SF-8	0.1094	0.104	0.1289	0.0737	0.0783	0.0783	0.0934	1
TraesTM9SF-9	0.0882	0.1417	0.1016	0.1153	0.1081	0.0962	0.0991	0.1042	1
TraesTM9SF-10	0.0984	0.328	0.0984	0.1089	0.0972	0.1223	0.1274	0.1223	0.0989	1
TraesTM9SF-11	0.0571	0.0771	0.0828	0.0865	0.1171	0.0657	0.12	0.0742	0.0771	0.0714	1
TraesTM9SF-12	0.2344	0.0986	0.0839	0.0737	0.0864	0.0783	0.0764	0.1362	0.0695	0.0904	0.0971	1
TraesTM9SF-13	0.0849	0.1095	0.0712	0.0897	0.063	0.126	0.1331	0.0958	0.0931	0.1123	0.1142	0.1013	1
TraesTM9SF-14	0.0916	0.132	0.1212	0.0641	0.0675	0.1051	0.1048	0.159	0.0997	0.1401	0.0857	0.1024	0.178	1
TraesTM9SF-15	0.095	0.112	0.115	0.0641	0.0702	0.1018	0.1019	0.1625	0.0882	0.1196	0.0914	0.0875	0.1753	0.876	1
TraesTM9SF-16	0.0972	0.096	0.1079	0.0833	0.0648	0.0731	0.0793	0.0875	0.1176	0.101	0.0914	0.1018	0.1041	0.1105	0.11	1
TraesTM9SF-17	0.0987	0.1173	0.232	0.0897	0.1	0.0835	0.0878	0.1827	0.0962	0.0957	0.0542	0.0814	0.063	0.1051	0.1075	0.1185	1
TraesTM9SF-18	0.1225	0.0933	0.09	0.0769	0.0918	0.0861	0.0963	0.12	0.0935	0.109	0.1114	0.1325	0.1095	0.2156	0.23	0.12	0.0925	1
TraesTM9SF-19	0.092	0.112	0.1125	0.0641	0.0702	0.1018	0.1019	0.1611	0.0882	0.1196	0.0914	0.0869	0.1753	0.876	0.9897	0.1074	0.1099	0.2352	1
TraesTM9SF-20	0.1081	0.1066	0.1572	0.0961	0.1081	0.0913	0.0736	0.14	0.1042	0.0851	0.0914	0.1081	0.1369	0.1212	0.1275	0.14	0.0987	0.105	0.1227	1
TraesTM9SF-21	0.1016	0.1497	0.0989	0.1217	0.1162	0.0935	0.0963	0.1069	0.877	0.1069	0.0742	0.0828	0.0986	0.0997	0.0882	0.1096	0.0935	0.0962	0.0882	0.0882	1
TraesTM9SF-22	0.0906	0.0986	0.0933	0.0833	0.1756	0.0693	0.0708	0.1013	0.1069	0.1093	0.0828	0.1013	0.0739	0.0673	0.0666	0.0906	0.08	0.0853	0.0666	0.0746	0.1069	1
TraesTM9SF-23	0.0862	0.1212	0.1185	0.0801	0.0945	0.1051	0.0906	0.132	0.1078	0.0997	0.12	0.0889	0.0958	0.1563	0.1401	0.0916	0.1185	0.1078	0.1401	0.1105	0.0997	0.0835	1
TraesTM9SF-24	0.1102	0.0986	0.1282	0.0641	0.0729	0.0913	0.0991	0.1102	0.0935	0.0797	0.1171	0.0923	0.1068	0.159	0.1435	0.1051	0.1205	0.1051	0.1435	0.1205	0.0855	0.096	0.4204	1
TraesTM9SF-25	0.0884	0.0646	0.0816	0.102	0.0714	0.0748	0.0918	0.085	0.0986	0.0714	0.0918	0.0748	0.0918	0.0884	0.0884	0.0952	0.0612	0.102	0.0884	0.0476	0.0918	0.0782	0.0748	0.0918	1
TraesTM9SF-26	0.1101	0.1101	0.1016	0.0865	0.096	0.1242	0.1529	0.1073	0.079	0.1327	0.0914	0.096	0.0903	0.0903	0.1016	0.079	0.0875	0.096	0.1016	0.0706	0.079	0.0819	0.0734	0.0875	0.085	1
TraesTM9SF-27	0.0885	0.12	0.0989	0.0865	0.0945	0.1566	0.1359	0.0807	0.0855	0.109	0.0714	0.1119	0.0986	0.097	0.0859	0.0911	0.0703	0.0885	0.0859	0.1015	0.0855	0.1093	0.0997	0.0937	0.0714	0.4661	1
TraesTM9SF-28	0.0913	0.1146	0.0962	0.0929	0.0756	0.0809	0.0906	0.1975	0.0989	0.101	0.0571	0.0987	0.0821	0.0916	0.095	0.1135	0.7061	0.1025	0.0971	0.1037	0.0962	0.0906	0.1078	0.1128	0.0612	0.0734	0.0651	1
TraesTM9SF-29	0.0887	0.1306	0.107	0.0801	0.1162	0.0992	0.0963	0.1044	0.0855	0.1276	0.1	0.0913	0.0986	0.1159	0.1227	0.1357	0.0809	0.1148	0.1227	0.1044	0.0935	0.0853	0.132	0.1174	0.0714	0.1129	0.1383	0.0757	1
TraesTM9SF-30	0.1255	0.0613	0.1318	0.0705	0.1108	0.1044	0.0906	0.107	0.1069	0.0664	0.0714	0.1125	0.0904	0.1051	0.115	0.1041	0.1382	0.095	0.1176	0.1105	0.1016	0.0719	0.1078	0.0948	0.0816	0.079	0.0937	0.1135	0.1044	1
TraesTM9SF-31	0.0973	0.0933	0.0851	0.0737	0.0783	0.0731	0.0793	0.2554	0.0989	0.109	0.0714	0.1192	0.0739	0.1078	0.1175	0.0924	0.1308	0.13	0.115	0.1916	0.0989	0.0879	0.1185	0.1179	0.068	0.0932	0.0937	0.1111	0.0992	0.107	1
TraesTM9SF-32	0.1341	0.112	0.1341	0.0737	0.081	0.0913	0.0906	0.8512	0.1016	0.1143	0.0771	0.1219	0.0986	0.1509	0.1424	0.1048	0.1777	0.1275	0.1457	0.1425	0.1042	0.0879	0.1347	0.1153	0.0816	0.1073	0.0781	0.1925	0.1044	0.1048	0.1097	1
TraesTM9SF-33	0.1531	0.0853	0.1055	0.1153	0.1	0.0783	0.0623	0.0778	0.0989	0.0771	0.0857	0.0928	0.0986	0.0619	0.075	0.2111	0.0839	0.085	0.0741	0.0982	0.1069	0.0853	0.0943	0.0666	0.0578	0.0903	0.0651	0.0864	0.0548	0.1044	0.0924	0.0853	1
TraesTM9SF-34	0.0859	0.0974	0.0945	0.0737	0.106	0.0802	0.1289	0.0859	0.0744	0.0888	0.4183	0.0888	0.0773	0.1002	0.1002	0.083	0.0945	0.0916	0.1002	0.0945	0.0687	0.0916	0.0945	0.0916	0.0646	0.106	0.0916	0.0974	0.0859	0.1002	0.0744	0.0859	0.0802	1
TraesTM9SF-35	0.08	0.784	0.112	0.0897	0.1216	0.0906	0.1048	0.1146	0.1417	0.456	0.0828	0.0853	0.0958	0.1132	0.0933	0.0986	0.1066	0.0933	0.0933	0.096	0.1524	0.1066	0.1239	0.0906	0.068	0.1186	0.0986	0.1013	0.1413	0.0586	0.0853	0.1226	0.1013	0.0888	1
TraesTM9SF-36	0.116	0.1013	0.1175	0.0801	0.0729	0.0861	0.0736	0.1021	0.0909	0.1063	0.0857	0.1183	0.1205	0.1132	0.1075	0.4292	0.1037	0.1449	0.1099	0.1719	0.0828	0.0879	0.0943	0.0923	0.102	0.0706	0.0885	0.0987	0.1201	0.1206	0.1192	0.0853	0.1113	0.1174	0.0986	1
TraesTM9SF-37	0.0849	0.1095	0.0712	0.0897	0.063	0.1232	0.1303	0.0958	0.0931	0.1095	0.1142	0.1013	0.9972	0.1753	0.1726	0.1041	0.063	0.1095	0.1726	0.1369	0.0986	0.0739	0.0958	0.1068	0.0884	0.0903	0.0986	0.0821	0.0986	0.0904	0.0739	0.0986	0.0986	0.0773	0.0958	0.1205	1
TraesTM9SF-38	0.0927	0.1093	0.1134	0.0641	0.0702	0.1018	0.1019	0.1623	0.0882	0.1196	0.0914	0.0876	0.178	0.8733	0.9948	0.1082	0.1082	0.2345	0.9974	0.1237	0.0882	0.0666	0.1401	0.1443	0.0884	0.1016	0.0859	0.1005	0.1227	0.1185	0.1159	0.1469	0.0747	0.1002	0.0906	0.1108	0.1753	1
TraesTM9SF-39	0.095	0.1093	0.115	0.0641	0.0702	0.1018	0.1019	0.1625	0.0882	0.1196	0.0914	0.0875	0.178	0.8733	0.9975	0.11	0.105	0.23	0.9872	0.1275	0.0882	0.0666	0.1401	0.1435	0.0884	0.1016	0.0859	0.0975	0.1227	0.115	0.1175	0.1424	0.075	0.1002	0.0906	0.1075	0.1753	0.9974	1
TraesTM9SF-40	0.096	0.1173	0.0986	0.0641	0.0594	0.1253	0.1048	0.1493	0.0828	0.152	0.08	0.0986	0.1753	0.6253	0.616	0.1066	0.0906	0.1653	0.616	0.112	0.0828	0.1306	0.1563	0.168	0.085	0.1158	0.112	0.0826	0.1013	0.1066	0.1146	0.1546	0.056	0.126	0.128	0.1439	0.1726	0.6186	0.6186	1
TraesTM9SF-41	0.0884	0.1126	0.0643	0.1057	0.1054	0.0804	0.0736	0.0965	0.1554	0.134	0.08	0.0965	0.1315	0.0835	0.0911	0.1018	0.0911	0.0911	0.0911	0.1045	0.2761	0.1018	0.1159	0.0991	0.0748	0.0734	0.0804	0.0965	0.0965	0.1018	0.0884	0.0991	0.0616	0.083	0.1152	0.1152	0.1315	0.0911	0.0911	0.0857	1
TraesTM9SF-42	0.087	0.0933	0.0897	0.0769	0.0972	0.1583	0.1133	0.1187	0.1042	0.1329	0.0971	0.1029	0.1369	0.1185	0.0923	0.0949	0.1029	0.1029	0.0923	0.1002	0.1069	0.1173	0.0943	0.0738	0.068	0.096	0.1108	0.1108	0.116	0.1002	0.1002	0.1213	0.087	0.106	0.1066	0.1002	0.1369	0.0923	0.0923	0.1413	0.1018	1
TraesTM9SF-43	0.0886	0.096	0.0911	0.0865	0.081	0.0783	0.0963	0.1063	0.1176	0.0957	0.0828	0.0784	0.0767	0.1132	0.1139	0.0835	0.0962	0.1215	0.1125	0.1037	0.1096	0.0746	0.0916	0.1025	0.0884	0.1045	0.1067	0.0962	0.0757	0.124	0.1139	0.1088	0.0835	0.0888	0.1146	0.1088	0.0767	0.1134	0.1139	0.1146	0.0991	0.0765	1
TraesTM9SF-44	0.1147	0.1173	0.0892	0.0833	0.0702	0.0887	0.0991	0.1275	0.0935	0.0824	0.1	0.1224	0.1068	0.1266	0.1224	0.153	0.0892	0.1403	0.1227	0.125	0.1016	0.096	0.1212	0.1358	0.0714	0.096	0.0807	0.0688	0.1253	0.0969	0.102	0.1403	0.0918	0.0888	0.112	0.1224	0.1068	0.1237	0.1224	0.1386	0.1126	0.0976	0.1096	1
TraesTM9SF-45	0.0849	0.096	0.1165	0.0993	0.0864	0.0966	0.0679	0.326	0.1042	0.0824	0.0914	0.1189	0.0739	0.1078	0.1175	0.0825	0.158	0.11	0.1125	0.2137	0.1016	0.096	0.0781	0.0615	0.0544	0.079	0.0807	0.1876	0.1436	0.1067	0.2773	0.217	0.114	0.0916	0.0826	0.08	0.0712	0.1134	0.1175	0.0933	0.1152	0.1266	0.1063	0.0892	1
TraesTM9SF-46	0.1076	0.1218	0.0849	0.0769	0.0849	0.1246	0.1898	0.1133	0.0793	0.1274	0.1057	0.0991	0.0764	0.0793	0.0849	0.0764	0.0793	0.0963	0.0849	0.0736	0.0736	0.0821	0.0708	0.0878	0.085	0.8385	0.3399	0.0764	0.1104	0.0651	0.0878	0.1104	0.0963	0.1031	0.1274	0.0679	0.0764	0.0849	0.0849	0.0963	0.0764	0.0906	0.1104	0.1048	0.0764	1
TraesTM9SF-47	0.0913	0.1306	0.0783	0.0769	0.0837	0.1906	0.1416	0.0809	0.0855	0.1037	0.0857	0.1148	0.0849	0.0808	0.0678	0.0887	0.0652	0.0887	0.0678	0.1096	0.0802	0.1093	0.0997	0.0966	0.0714	0.3361	0.8511	0.0704	0.1279	0.0887	0.0861	0.0783	0.0704	0.0888	0.1066	0.0835	0.0849	0.0678	0.0678	0.0986	0.0857	0.1002	0.1148	0.0887	0.0757	0.4702	1
	TraesTM9SF-1	TraesTM9SF-2	TraesTM9SF-3	TraesTM9SF-4	TraesTM9SF-5	TraesTM9SF-6	TraesTM9SF-7	TraesTM9SF-8	TraesTM9SF-9	TraesTM9SF-10	TraesTM9SF-11	TraesTM9SF-12	TraesTM9SF-13	TraesTM9SF-14	TraesTM9SF-15	TraesTM9SF-16	TraesTM9SF-17	TraesTM9SF-18	TraesTM9SF-19	TraesTM9SF-20	TraesTM9SF-21	TraesTM9SF-22	TraesTM9SF-23	TraesTM9SF-24	TraesTM9SF-25	TraesTM9SF-26	TraesTM9SF-27	TraesTM9SF-28	TraesTM9SF-29	TraesTM9SF-30	TraesTM9SF-31	TraesTM9SF-32	TraesTM9SF-33	TraesTM9SF-34	TraesTM9SF-35	TraesTM9SF-36	TraesTM9SF-37	TraesTM9SF-38	TraesTM9SF-39	TraesTM9SF-40	TraesTM9SF-41	TraesTM9SF-42	TraesTM9SF-43	TraesTM9SF-44	TraesTM9SF-45	TraesTM9SF-46	TraesTM9SF-47
IDENTITY STATS
min = 4.76
max = 99.75
mean = 12.0321646623497
stddev = 11.3341623348299

## Sheet: Similarity
SIMILARITY RESULTS
TraesTM9SF-1	1
TraesTM9SF-2	0.1253	1
TraesTM9SF-3	0.1486	0.1653	1
TraesTM9SF-4	0.1153	0.1442	0.1378	1
TraesTM9SF-5	0.1054	0.1675	0.1216	0.1282	1
TraesTM9SF-6	0.1409	0.1333	0.1514	0.1346	0.1459	1
TraesTM9SF-7	0.1218	0.1501	0.1416	0.1378	0.1303	0.4844	1
TraesTM9SF-8	0.1386	0.144	0.1751	0.1025	0.1243	0.1174	0.1331	1
TraesTM9SF-9	0.1203	0.1925	0.139	0.173	0.1432	0.1149	0.1331	0.155	1
TraesTM9SF-10	0.1382	0.3786	0.1436	0.1346	0.1486	0.1781	0.1643	0.1462	0.139	1
TraesTM9SF-11	0.1028	0.1228	0.1342	0.1314	0.1628	0.1142	0.1914	0.1085	0.1371	0.1228	1
TraesTM9SF-12	0.2559	0.128	0.1247	0.1185	0.1162	0.1305	0.1359	0.1703	0.0882	0.1303	0.1485	1
TraesTM9SF-13	0.1095	0.1589	0.1287	0.1282	0.126	0.1753	0.1841	0.1698	0.1342	0.1534	0.1485	0.1479	1
TraesTM9SF-14	0.1239	0.1698	0.1698	0.0929	0.1216	0.1482	0.1388	0.1994	0.1428	0.1778	0.1285	0.1455	0.2136	1
TraesTM9SF-15	0.125	0.1573	0.1575	0.0929	0.1297	0.1383	0.1388	0.2075	0.1283	0.1622	0.1314	0.1325	0.2109	0.884	1
TraesTM9SF-16	0.1273	0.144	0.1702	0.1153	0.1054	0.0966	0.1161	0.1313	0.1577	0.1462	0.1342	0.1226	0.1342	0.1401	0.15	1
TraesTM9SF-17	0.1283	0.1573	0.279	0.141	0.1351	0.1122	0.1218	0.2148	0.1283	0.1382	0.0914	0.116	0.1123	0.1536	0.1625	0.1654	1
TraesTM9SF-18	0.1675	0.144	0.1225	0.125	0.1351	0.1253	0.1444	0.1675	0.1336	0.1515	0.1542	0.1675	0.1479	0.2506	0.2625	0.1525	0.125	1
TraesTM9SF-19	0.1227	0.1573	0.156	0.0929	0.1297	0.1383	0.1388	0.2046	0.1283	0.1622	0.1314	0.1329	0.2109	0.884	0.9897	0.1457	0.1662	0.2685	1
TraesTM9SF-20	0.1425	0.152	0.2014	0.1282	0.154	0.1201	0.0991	0.1842	0.1577	0.1356	0.1371	0.1302	0.1808	0.1671	0.1675	0.1744	0.1407	0.1425	0.1611	1
TraesTM9SF-21	0.1283	0.1978	0.139	0.1666	0.1486	0.1203	0.1388	0.1631	0.8823	0.1443	0.1257	0.0989	0.1369	0.1401	0.1256	0.1417	0.1336	0.1417	0.1256	0.1283	1
TraesTM9SF-22	0.1173	0.1546	0.1306	0.1378	0.2027	0.1226	0.1161	0.1386	0.131	0.168	0.1342	0.1226	0.126	0.1266	0.128	0.136	0.1146	0.1333	0.128	0.128	0.139	1
TraesTM9SF-23	0.1212	0.1644	0.1428	0.1153	0.1243	0.1455	0.1274	0.1832	0.1509	0.1455	0.16	0.1051	0.1452	0.1994	0.1859	0.1374	0.1401	0.1482	0.1859	0.1482	0.1428	0.1293	1
TraesTM9SF-24	0.1435	0.1413	0.1743	0.0929	0.0972	0.1227	0.1444	0.1538	0.131	0.125	0.1657	0.1153	0.1643	0.2156	0.2	0.1358	0.1564	0.1512	0.2	0.1769	0.1229	0.1333	0.442	1
TraesTM9SF-25	0.1292	0.0884	0.1224	0.136	0.1122	0.1054	0.1156	0.1122	0.1496	0.1122	0.1258	0.1156	0.119	0.1224	0.1224	0.119	0.0918	0.1326	0.1224	0.0714	0.1428	0.1292	0.1258	0.136	1
TraesTM9SF-26	0.1327	0.144	0.1327	0.1346	0.1384	0.1497	0.1954	0.1468	0.1129	0.1638	0.16	0.1214	0.1412	0.1355	0.1412	0.1129	0.1299	0.1355	0.1412	0.1073	0.1214	0.1158	0.1242	0.1355	0.1428	1
TraesTM9SF-27	0.1119	0.1653	0.1328	0.1185	0.1405	0.1932	0.1671	0.1197	0.1042	0.1542	0.1542	0.1328	0.1342	0.1374	0.1276	0.138	0.0963	0.1197	0.1276	0.1458	0.1122	0.144	0.1428	0.138	0.1156	0.4858	1
TraesTM9SF-28	0.1111	0.1493	0.1555	0.1346	0.1081	0.1227	0.1416	0.232	0.131	0.1436	0.1114	0.1382	0.1315	0.1482	0.1575	0.1432	0.7308	0.1325	0.1611	0.1283	0.131	0.1333	0.1428	0.1641	0.0884	0.1101	0.0859	1
TraesTM9SF-29	0.1201	0.16	0.1514	0.1314	0.1513	0.1488	0.1473	0.154	0.1283	0.1648	0.1285	0.1357	0.1424	0.1536	0.154	0.1775	0.1044	0.1801	0.154	0.1383	0.1283	0.1253	0.1698	0.1383	0.1088	0.144	0.1958	0.1044	1
TraesTM9SF-30	0.1493	0.0853	0.1462	0.1025	0.1486	0.1409	0.1246	0.1459	0.1283	0.0904	0.1314	0.132	0.1205	0.1401	0.1525	0.1365	0.158	0.135	0.1508	0.1523	0.1256	0.112	0.1455	0.1256	0.1224	0.1101	0.1276	0.1456	0.1253	1
TraesTM9SF-31	0.1192	0.1413	0.1338	0.1314	0.1216	0.0887	0.0934	0.2895	0.1577	0.1515	0.1171	0.1557	0.1095	0.1671	0.1675	0.1411	0.1827	0.1575	0.1636	0.2186	0.155	0.1386	0.1617	0.1564	0.102	0.1355	0.1432	0.158	0.1409	0.1532	1
TraesTM9SF-32	0.1658	0.152	0.1853	0.1025	0.1297	0.1383	0.1303	0.8536	0.155	0.1382	0.1114	0.1536	0.1726	0.1913	0.185	0.1463	0.2098	0.175	0.1867	0.1916	0.1631	0.1226	0.1805	0.1589	0.1088	0.1468	0.1119	0.2271	0.1514	0.139	0.1439	1
TraesTM9SF-33	0.1925	0.1413	0.1438	0.1442	0.1378	0.1409	0.1076	0.1167	0.131	0.101	0.1314	0.1322	0.1506	0.097	0.11	0.2389	0.116	0.1425	0.1074	0.1326	0.1417	0.1146	0.1563	0.123	0.1156	0.1412	0.1197	0.1185	0.0939	0.1415	0.1313	0.1243	1
TraesTM9SF-34	0.1375	0.1547	0.1404	0.1089	0.1547	0.1404	0.1776	0.126	0.106	0.1432	0.4527	0.1346	0.1117	0.1489	0.1461	0.1289	0.1461	0.126	0.1461	0.1289	0.0945	0.1232	0.1461	0.1461	0.119	0.169	0.1489	0.1432	0.1375	0.1432	0.1318	0.1289	0.1318	1
TraesTM9SF-35	0.1093	0.7973	0.168	0.1314	0.1729	0.1413	0.1359	0.1546	0.1951	0.4906	0.12	0.112	0.1452	0.1509	0.1386	0.1493	0.152	0.1493	0.1386	0.1466	0.2005	0.168	0.1644	0.1226	0.1088	0.1553	0.136	0.1413	0.176	0.0853	0.1333	0.1626	0.1466	0.1318	1
TraesTM9SF-36	0.1438	0.1466	0.1534	0.1378	0.1189	0.1279	0.1019	0.1411	0.1229	0.1436	0.1228	0.1461	0.1534	0.1374	0.1375	0.4385	0.1358	0.19	0.1381	0.2113	0.1096	0.1386	0.1239	0.1282	0.1258	0.1045	0.1302	0.1135	0.1697	0.1577	0.1703	0.1219	0.1461	0.1633	0.1386	1
TraesTM9SF-37	0.1095	0.1589	0.1287	0.1282	0.126	0.1753	0.1841	0.1698	0.1342	0.1534	0.1485	0.1479	1	0.2136	0.2109	0.1342	0.1123	0.1479	0.2109	0.1808	0.1369	0.126	0.1452	0.1643	0.119	0.1412	0.1342	0.1315	0.1424	0.1205	0.1095	0.1726	0.1506	0.1117	0.1452	0.1534	1
TraesTM9SF-38	0.1237	0.1573	0.1572	0.0929	0.1297	0.1383	0.1388	0.2061	0.1283	0.1622	0.1314	0.134	0.2109	0.884	0.9974	0.1469	0.1675	0.268	1	0.1623	0.1256	0.128	0.1859	0.201	0.1224	0.1412	0.1276	0.1623	0.154	0.152	0.1649	0.1881	0.1082	0.1461	0.1386	0.1391	0.2109	1
TraesTM9SF-39	0.125	0.1573	0.1575	0.0929	0.1297	0.1383	0.1388	0.2075	0.1283	0.1622	0.1314	0.1325	0.2109	0.884	1	0.15	0.1625	0.2625	0.9897	0.1675	0.1256	0.128	0.1859	0.2	0.1224	0.1412	0.1276	0.1575	0.154	0.1525	0.1675	0.185	0.11	0.1461	0.1386	0.1375	0.2109	0.9974	1
TraesTM9SF-40	0.1386	0.1626	0.1333	0.0929	0.1054	0.1786	0.1388	0.1786	0.1229	0.2053	0.1314	0.1386	0.2164	0.6469	0.64	0.1573	0.136	0.216	0.64	0.1546	0.1203	0.176	0.2102	0.2133	0.1258	0.1581	0.1653	0.1306	0.16	0.1493	0.1546	0.1839	0.104	0.1776	0.176	0.168	0.2164	0.64	0.64	1
TraesTM9SF-41	0.126	0.1528	0.1126	0.125	0.1486	0.1045	0.1133	0.1554	0.1983	0.1903	0.12	0.1313	0.1726	0.1105	0.1206	0.142	0.1447	0.1286	0.1206	0.134	0.3136	0.1447	0.1455	0.1447	0.119	0.1214	0.1152	0.1394	0.1474	0.134	0.1233	0.1581	0.1045	0.1318	0.1581	0.1474	0.1726	0.1206	0.1206	0.1179	1
TraesTM9SF-42	0.1213	0.1333	0.1451	0.125	0.1486	0.2137	0.1614	0.1556	0.1363	0.1622	0.1314	0.1424	0.1972	0.1725	0.1424	0.1292	0.153	0.1319	0.1424	0.1345	0.139	0.1493	0.1455	0.116	0.1224	0.1271	0.1556	0.153	0.1503	0.1372	0.1503	0.1635	0.1187	0.1489	0.136	0.1345	0.1972	0.1424	0.1424	0.2026	0.142	1
TraesTM9SF-43	0.1215	0.1466	0.1341	0.141	0.127	0.1148	0.1359	0.1291	0.147	0.1329	0.14	0.1113	0.1178	0.1509	0.1468	0.1113	0.1291	0.1443	0.1457	0.1468	0.1417	0.1146	0.1347	0.1205	0.119	0.1751	0.177	0.1291	0.1227	0.1518	0.1493	0.1291	0.1164	0.1318	0.1653	0.1367	0.1178	0.1469	0.1468	0.144	0.1474	0.1029	1
TraesTM9SF-44	0.1479	0.1466	0.1326	0.125	0.1216	0.1409	0.1416	0.1658	0.1363	0.117	0.14	0.1479	0.1534	0.1698	0.1734	0.2117	0.1428	0.1709	0.1713	0.1581	0.1443	0.136	0.1536	0.1641	0.1054	0.1242	0.1171	0.1122	0.1697	0.1352	0.1377	0.1734	0.1301	0.1346	0.144	0.1862	0.1534	0.1726	0.1734	0.1973	0.1635	0.1424	0.1632	1
TraesTM9SF-45	0.1213	0.1333	0.182	0.141	0.1324	0.1305	0.0991	0.36	0.1604	0.125	0.1371	0.148	0.1315	0.1374	0.1525	0.131	0.195	0.15	0.1457	0.2481	0.1524	0.1493	0.1266	0.0974	0.0986	0.1299	0.1458	0.237	0.1932	0.1383	0.3065	0.2512	0.1529	0.1346	0.128	0.1359	0.1315	0.1469	0.1525	0.1146	0.1394	0.1741	0.1367	0.1096	1
TraesTM9SF-46	0.1359	0.1558	0.1218	0.1153	0.1331	0.1614	0.2436	0.1529	0.1161	0.1643	0.18	0.1218	0.1303	0.1303	0.1303	0.1019	0.1331	0.1388	0.1303	0.1019	0.1189	0.1189	0.1161	0.1303	0.1394	0.8555	0.3739	0.1161	0.1359	0.1019	0.1274	0.1501	0.1359	0.1661	0.1643	0.0934	0.1303	0.1303	0.1303	0.1416	0.1246	0.1246	0.1784	0.1274	0.1218	1
TraesTM9SF-47	0.1174	0.176	0.1174	0.0993	0.1324	0.2375	0.1869	0.1174	0.1042	0.1542	0.1714	0.1383	0.1232	0.1239	0.1096	0.1227	0.0992	0.1201	0.1096	0.1462	0.1069	0.1466	0.1401	0.1357	0.1122	0.37	0.8668	0.0913	0.1723	0.1227	0.1305	0.1148	0.1174	0.1489	0.144	0.1227	0.1232	0.1096	0.1096	0.1546	0.1233	0.1451	0.1775	0.1227	0.1331	0.49	1
	TraesTM9SF-1	TraesTM9SF-2	TraesTM9SF-3	TraesTM9SF-4	TraesTM9SF-5	TraesTM9SF-6	TraesTM9SF-7	TraesTM9SF-8	TraesTM9SF-9	TraesTM9SF-10	TraesTM9SF-11	TraesTM9SF-12	TraesTM9SF-13	TraesTM9SF-14	TraesTM9SF-15	TraesTM9SF-16	TraesTM9SF-17	TraesTM9SF-18	TraesTM9SF-19	TraesTM9SF-20	TraesTM9SF-21	TraesTM9SF-22	TraesTM9SF-23	TraesTM9SF-24	TraesTM9SF-25	TraesTM9SF-26	TraesTM9SF-27	TraesTM9SF-28	TraesTM9SF-29	TraesTM9SF-30	TraesTM9SF-31	TraesTM9SF-32	TraesTM9SF-33	TraesTM9SF-34	TraesTM9SF-35	TraesTM9SF-36	TraesTM9SF-37	TraesTM9SF-38	TraesTM9SF-39	TraesTM9SF-40	TraesTM9SF-41	TraesTM9SF-42	TraesTM9SF-43	TraesTM9SF-44	TraesTM9SF-45	TraesTM9SF-46	TraesTM9SF-47
		SIMILARITY STATS
		min = 7.14			TraesTM9SF-20/TraesTM9SF-25
		max = 100
		mean = 17.8367043911272			TraesTM9SF-13/TraesTM9SF-37
		stddev = 16.2363131677735			TraesTM9SF-38/TraesTM9SF-19
					TraesTM9SF-15/TraesTM9SF-39
